# Supplementary material for: A tetranuclear iridium(iii) complex with a flavin analogue as a bridging ligand in different coordination modes and exchangeable anion encapsulation in a supramolecular cage
Source: Royal Society of Chemistry journal article supplement (doi:10.1039/b911033j), 2009-01-01
Supplement: b911033j.pdf [file b911033j.pdf]

Supplementary Information

For

**A Tetranuclear Iridium(III) Complex Having a Flavin Analogue as Bridging Ligands in Different Coordination Modes and Exchangeable Anion Encapsulation in a Supramolecular Cage**

**Takahiko Kojima,\* Yuji Inui, Soushi Miyazaki, Motoo Shiro and Shunichi Fukuzumi\***

## Experimental Section

**Preparation of 1-PF<sub>6</sub>.** 1-PF<sub>6</sub>: To a suspension of [IrCl<sub>2</sub>(Cp\*)]<sub>2</sub> (161 mg, 0.202 mmol) in acetonitrile (20 ml) was added AgPF<sub>6</sub> (103 mg, 0.408 mmol). After 30 min of stirring at RT, the white precipitate of AgCl was filtered off through a Celite pad and yellow powder was obtained by removing acetonitrile. After dissolving the yellow powder into methanol (30 cm<sup>3</sup>), alloxazine (87.8 mg, 0.410 mmol) was added to the solution under Ar. The mixture was stirred for 24 h at RT and then the solvent was removed by a rotary evaporator. The residue was dissolved in a small volume of acetone and the solution was filtered and then orange powder precipitated by adding a large amount of diethyl ether to the filtrate. The orange powder was stirred overnight in chloroform. After that the orange precipitate of [Ir(Cp\*)(Halo)Cl]PF<sub>6</sub> (**A**) was collected by filtration, washed with chloroform and then dried in vacuo (yield: 33%). Elemental analysis (%) calcd for C<sub>20.5</sub>H<sub>21.5</sub>O<sub>2</sub>N<sub>4</sub>IrCl<sub>2.5</sub>PF<sub>6</sub>(A·0.5(CHCl<sub>3</sub>)): C 31.50, H 2.77, N 7.17; found: C 31.80, H 2.94, N 6.62.

The precursor complex **A** was dissolved into acetone and vapour diffusion of CHCl<sub>3</sub> into the solution gave crude crystalline 1-PF<sub>6</sub> which was contaminated by alloxazine.

This crude product was dissolved into acetone and the solution was filtered to remove alloxazine. To the solution,  $\text{CHCl}_3$  vapour was diffused again to obtain red single crystals of **1-PF<sub>6</sub>**. Elemental analysis (%) calcd for  $\text{C}_{73}\text{H}_{81}\text{N}_{12}\text{O}_8\text{Cl}_{11}\text{P}_2\text{F}_{12}\text{Ir}_4$  (**1-PF<sub>6</sub>•3CHCl<sub>3</sub>•2H<sub>2</sub>O**): C 32.43, H 3.02, N 6.22; found: C 32.40, H 2.97, N 6.30.

Absorption maxima in acetone ( $\lambda_{\text{max}}$ , nm ( $\epsilon$ ,  $\text{mol}^{-1} \text{dm}^3 \text{cm}^{-1}$ ): 358 ( $2.4 \times 10^4$ ), 400 ( $2.4 \times 10^4$ ), 455 and 535 (shoulder).

**Preparation of 1-ClO<sub>4</sub>.** To a solution of **1-PF<sub>6</sub>** in acetone, 20-fold excess amount of [(*n*-butyl)<sub>4</sub>N]ClO<sub>4</sub> was added as solids. Vapour diffusion of  $\text{CHCl}_3$  into the solution gave red single crystals of **1-ClO<sub>4</sub>**. Elemental analysis (%) calcd for  $\text{C}_{72.5}\text{H}_{76.5}\text{N}_{12}\text{O}_{14}\text{Cl}_{11.5}\text{Ir}_4$  (**1-ClO<sub>4</sub>•2.5CHCl<sub>3</sub>**): C 34.60, H 3.06, N 6.68; found: C 34.60, H 3.16, N 6.89.

**Notes on X-ray crystallography.** Severe disorder of the solvent molecules of crystallization was observed in both crystals and those molecules were treated with isotropic thermal parameters. Considerably large R values might be due to imperfectness of the disordered models of the solvents. The cations in **1-ClO<sub>4</sub>** and **1-PF<sub>6</sub>** were also disordered: the alloxazine ligand bridging between Ir2 and Ir4 could be resolved in two

disordered moieties, which were treated as rigid groups. Hydrogen atoms of waters in **1**-PF<sub>6</sub> could not be located in the final d-Fourier map.

The crystals contain large solvent-accessible voids. However, we could not locate residual solvent molecules in the final d-Fourier map. The SQUEEZE procedure was not applied.

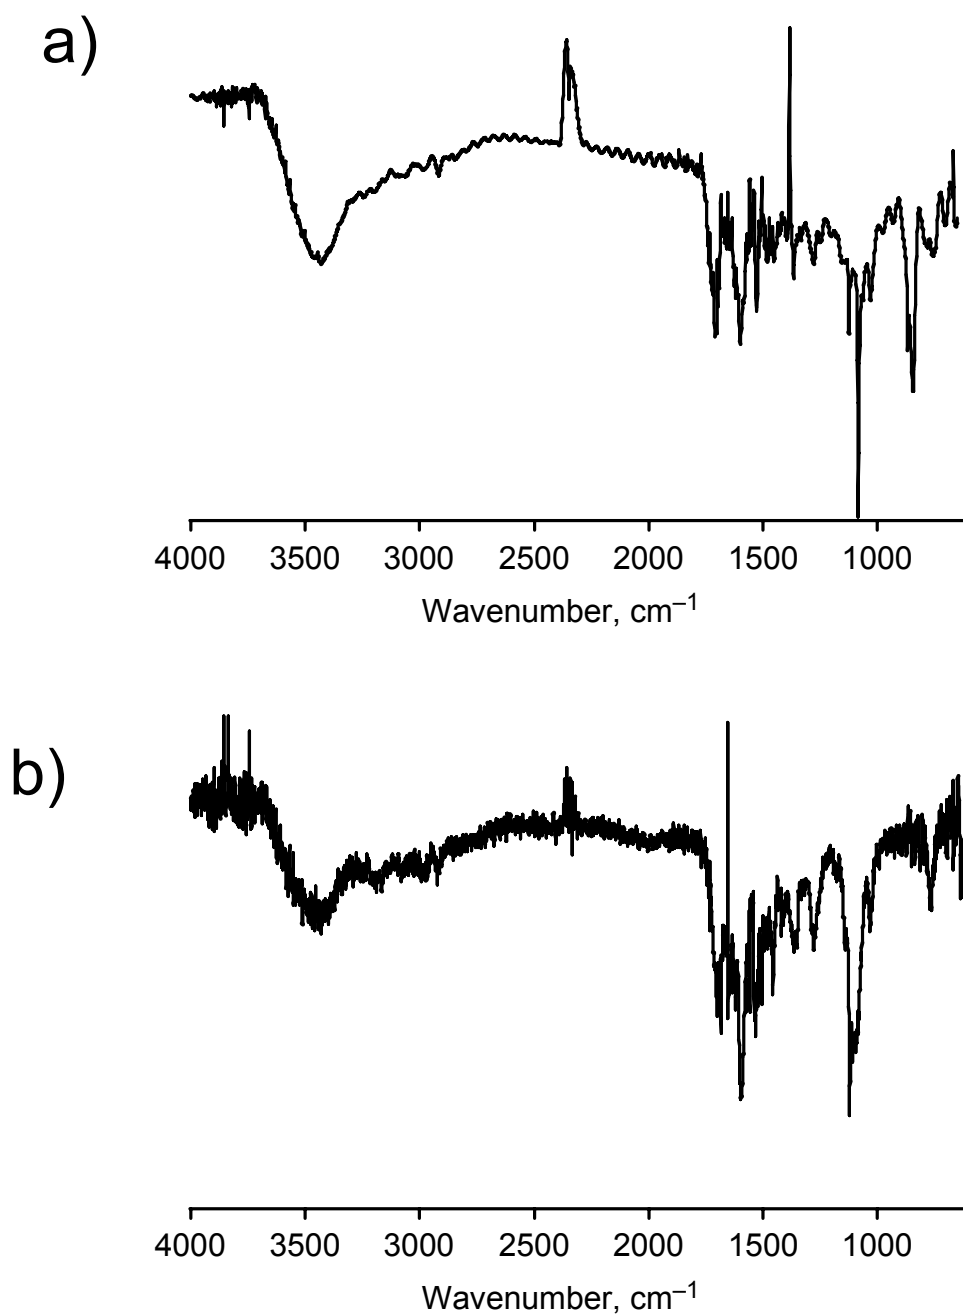

**Fig. S1** IR spectra of **1-PF<sub>6</sub>** (a) and **1-ClO<sub>4</sub>** (b) measured in KBr pellets at room temperature.

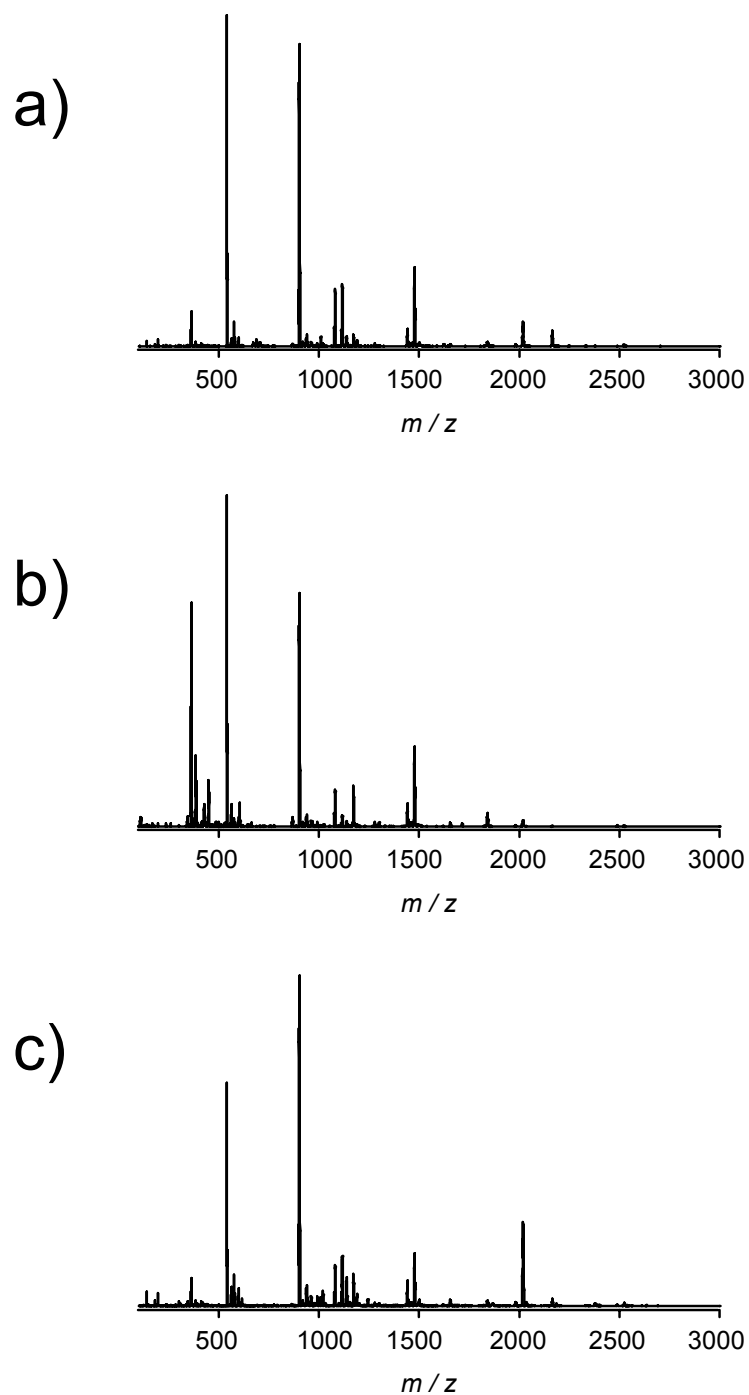

**Fig. S2** ESI-MS spectra of **1-PF<sub>6</sub>** just after dissolving into acetone (a), 24h later after dissolving crystals of **1-PF<sub>6</sub>** into acetone (b), and recrystallized sample of **1-PF<sub>6</sub>** just after dissolving into acetone.
